# Supplementary material for: A novel classification method for NSCLC based on the background interaction network and the edge-perturbation matrix
Source: Aging (Albany NY). 2022 Apr 9;14(7):3155–74. doi: 10.18632/aging.204004 (PMC9037255; doi:10.18632/aging.204004)
Supplement: Supplementary Figures [file aging-14-204004-s001.pdf]

SUPPLEMENTARY FIGURES

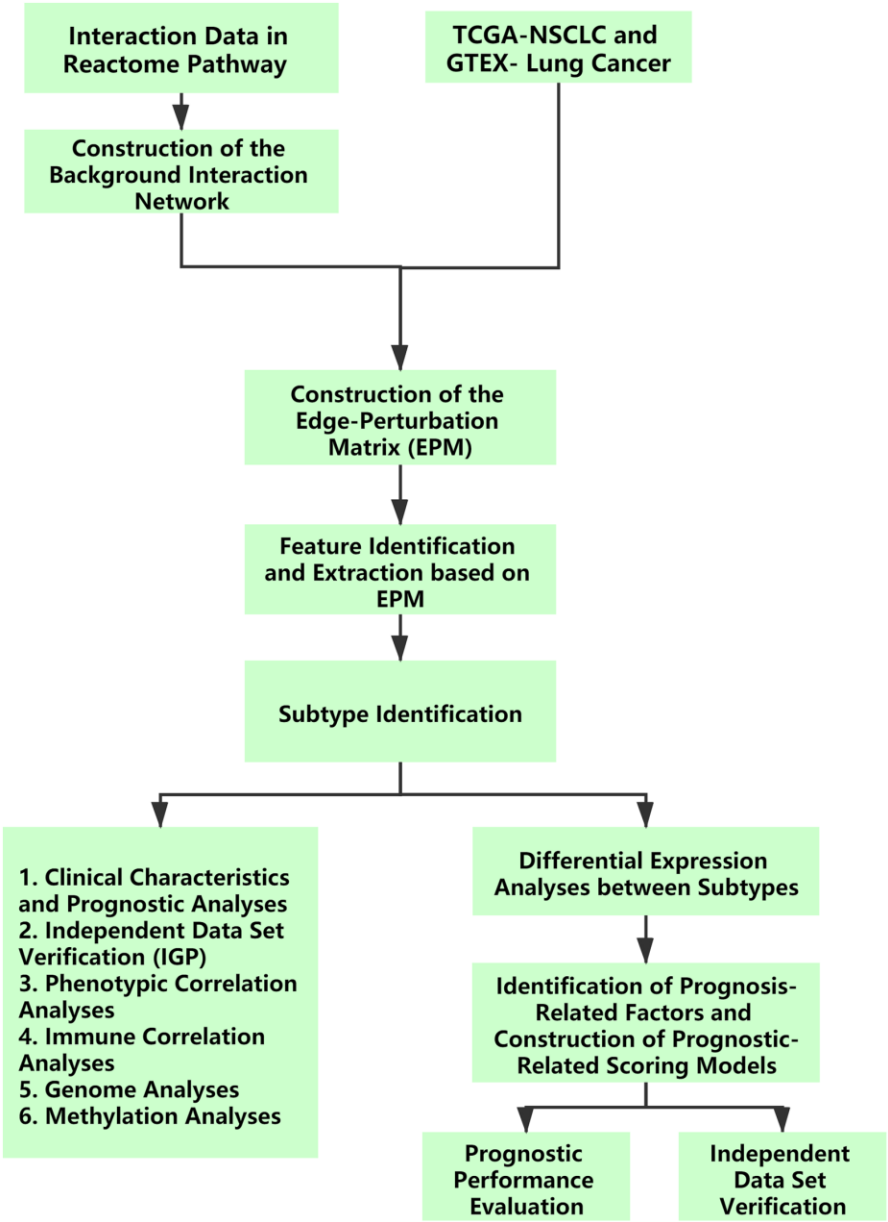

Supplementary Figure 1. The flow diagram of the study.

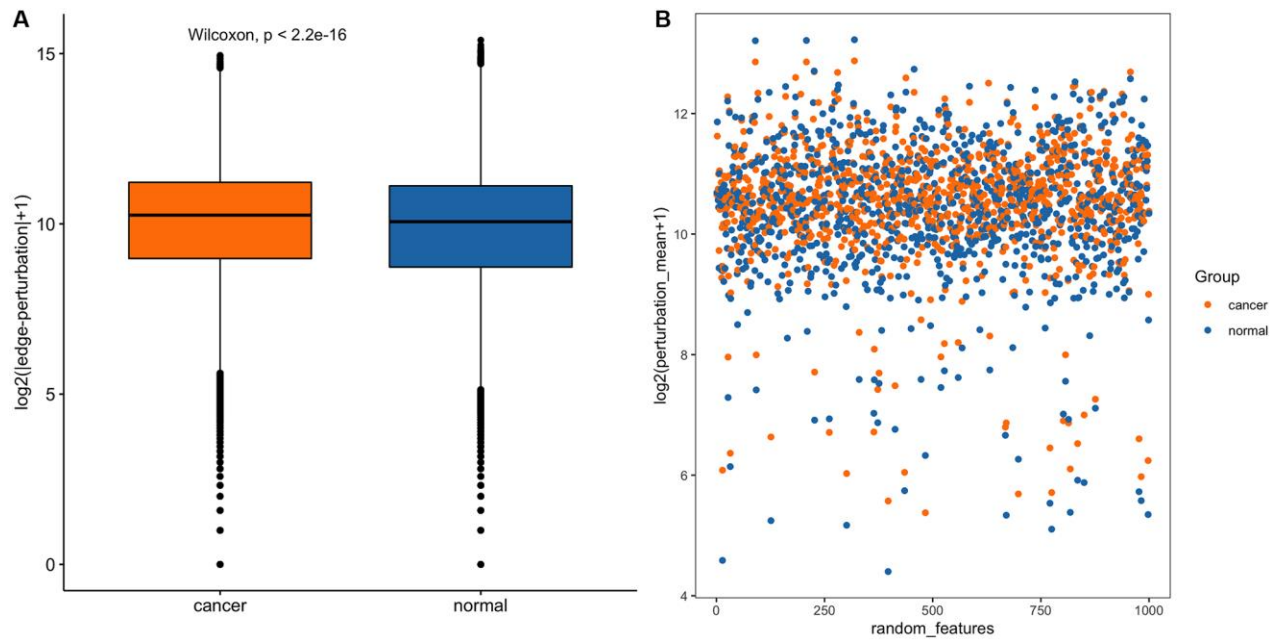

**Supplementary Figure 2. Edge-perturbation matrix construction and feature extraction.** (A) Box-plot diagrams of randomly selected 1000 features in cancer and normal samples. (B) Scatter plots of randomly selected 1000 features in cancer and normal samples.

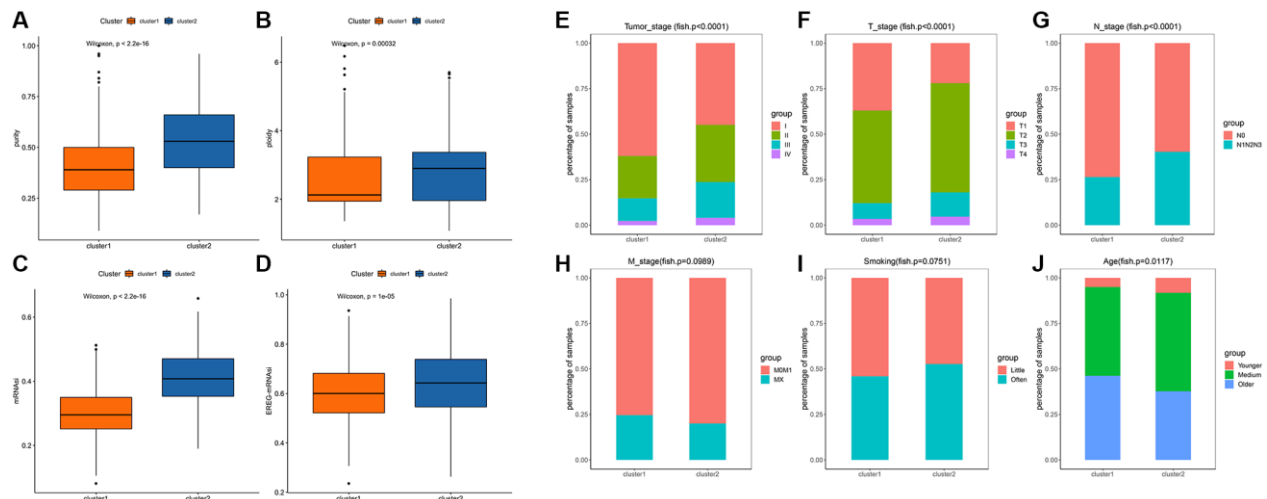

**Supplementary Figure 3. (A–D)** Comparative analysis results of edge perturbation feature subtypes. **(A)** Differences in tumor purity between cluster 1 and cluster 2: The abscissa axis represents the cluster group; the ordinate axis represents the percentage of tumor purity. **(B)** Differences in genome ploidy between cluster 1 and cluster 2: The abscissa axis represents the cluster group; the ordinate axis represents the percentage of tumor genome ploidy. **(C)** Differences in stemness indices of mRNA between cluster 1 and cluster 2: The abscissa axis represents the cluster group; the ordinate axis represents the percentage of stemness indices of mRNA. **(D)** Differences in epigenetic regulated stemness indices of mRNA between cluster 1 and cluster 2: The abscissa axis represents the cluster group; the ordinate axis represents the percentage of epigenetic regulated stemness indices of mRNA. **(E–J)** Comparison of clinical characteristics among different subtypes. **(E)** Comparison of the proportions of different stages (Stage I–IV) in different clusters: The abscissa axis represents different clusters; the ordinate axis represents the proportion of different stages. **(F)** Comparison of the proportions of different T stages (T1–T4) in different clusters: The abscissa axis represents different clusters; the ordinate axis represents the proportion of different T stages (T1–T4). **(G)** Comparison of the proportions of different N stages (N1–N3) in different clusters: The abscissa axis represents different clusters; the ordinate axis represents the proportion of different N stages (N1–N3). **(H)** Comparison of the proportions of different M stages (M0M1 or Mx) in different clusters: The abscissa axis represents different clusters; the ordinate axis represents the proportion of different M stages (M0M1 or Mx). **(I)** Comparison of the proportions of different smoking status in different clusters: The abscissa axis represents different clusters; the ordinate axis represents the proportion of different smoking status (little or often). **(J)** Comparison of the proportions of different age stages in different clusters: The abscissa axis represents different clusters; the ordinate axis represents the proportion of different age stages (younger, medium or older).

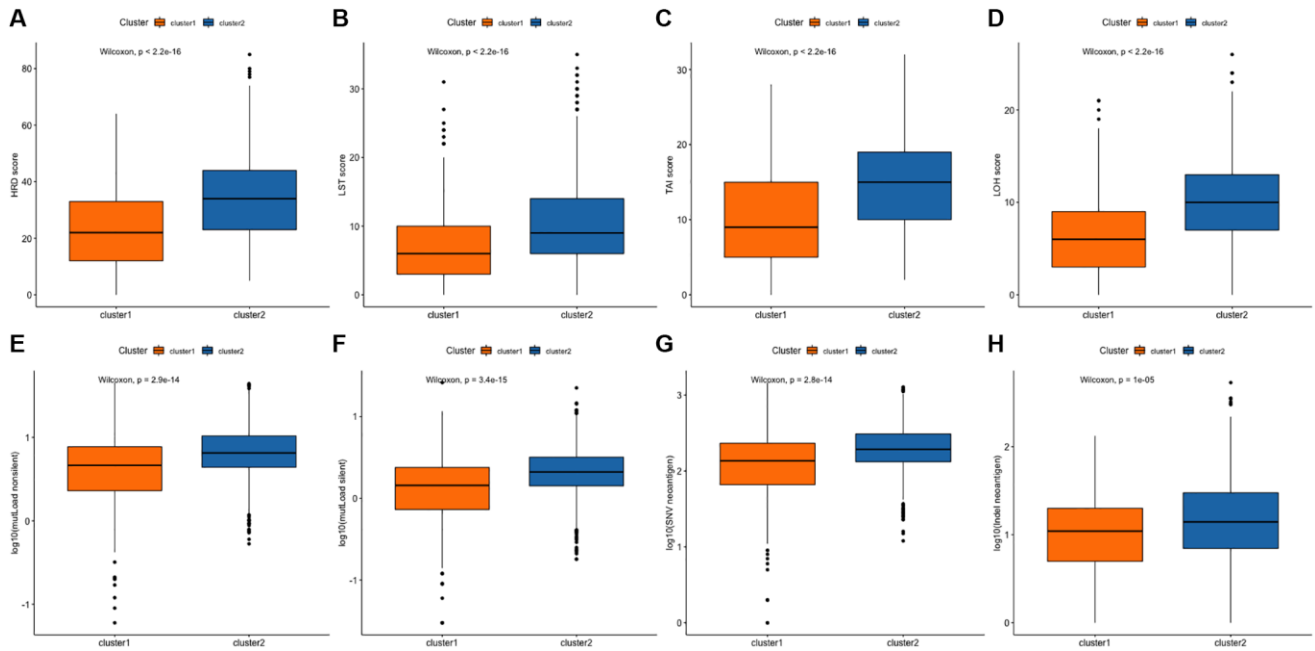

**Supplementary Figure 4. Comparison of immune escape mechanism between the two clusters.** (A) Comparison of homologous recombination deficiency scores between the two clusters: The abscissa axis represents different clusters; the ordinate axis represents the HRD score. (B) The level of chromosome instability between the two clusters: The abscissa axis represents different clusters; the ordinate axis represents the LST score. (C) The level of chromosome instability between the two clusters: The abscissa axis represents different clusters; the ordinate axis represents the TAI score. (D) The level of chromosome instability between the two clusters: The abscissa axis represents different clusters; the ordinate axis represents the LOH score. (E) The level of tumor mutation load between the two clusters: The abscissa axis represents different clusters; the ordinate axis represents the value of  $\log_{10}(\text{mutLoad nonsilent})$ . (F) The level of tumor mutation load between the two clusters: The abscissa axis represents different clusters; the ordinate axis represents the value of  $\log_{10}(\text{mutLoad silent})$ . (G) The level of tumor neoantigen load between the two clusters: The abscissa axis represents different clusters; the ordinate axis represents the value of  $\log_{10}(\text{SNV neoantigen})$ . (H) The level of tumor neoantigen load between the two clusters: The abscissa axis represents different clusters; the ordinate axis represents the value of  $\log_{10}(\text{Indel neoantigen})$ .

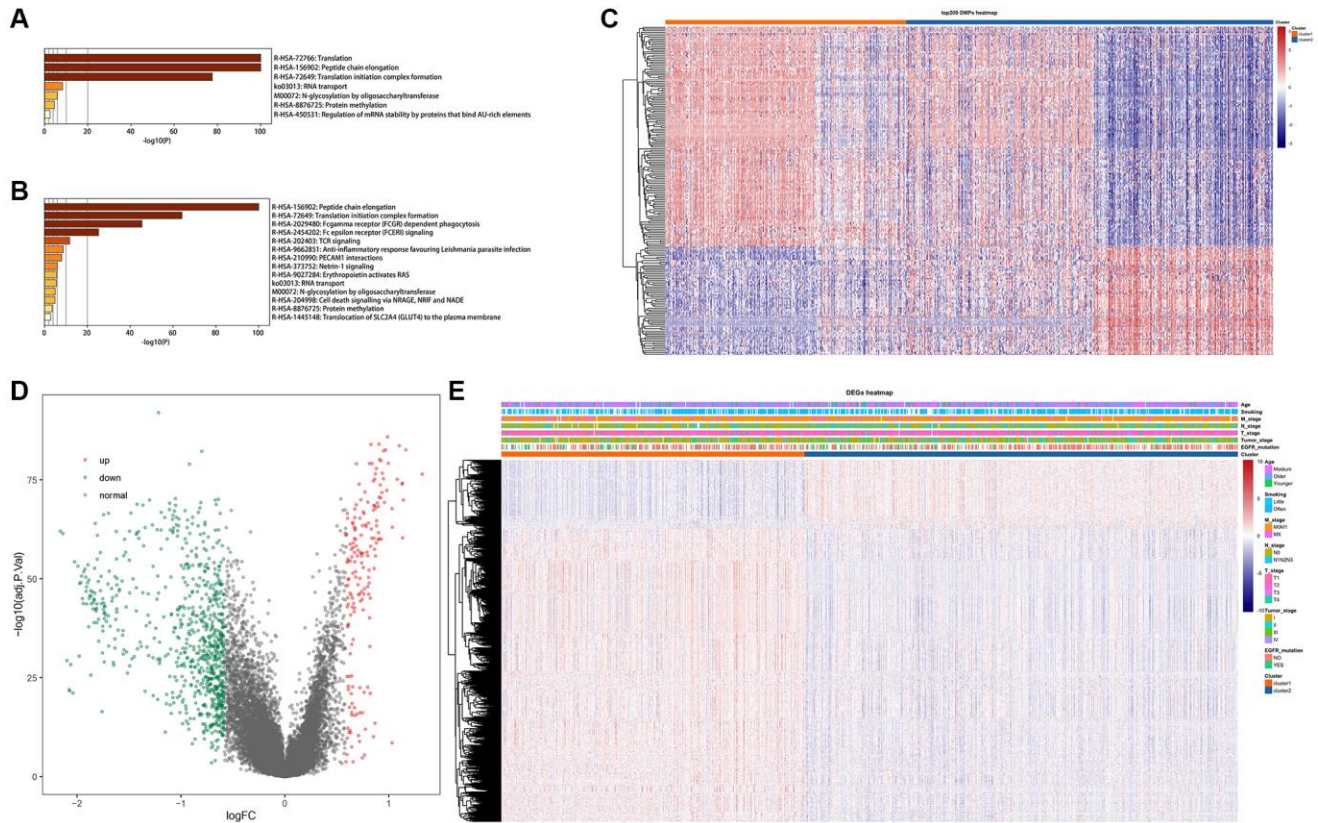

**Supplementary Figure 5.** (A) Pathway enrichment analysis results of the cluster 1. (B) Pathway enrichment analysis results of the cluster 2. (C) Identification results of differential methylation sites among characteristic subtypes: z-score heatmap of the top200 differential methylation sites. (D) Volcano map of differentially expressed genes. (E) Z-score heatmap of differentially expressed genes.
